# Supplementary material
Source: PubMed Central journal article supplement (PMC4656878)
Supplement: mmc1.pdf [file mmc1.pdf]

**Biophysical Journal**

**Supporting Material**

**Kymographic Imaging of the Elastic Modulus of Epithelial Cells during the Onset of Migration**

Esra Roan,<sup>1,\*</sup> Kristina Wilhelm,<sup>2</sup> and Christopher M. Waters<sup>2,3</sup>

<sup>1</sup>Biomedical Engineering Department, University of Memphis, Memphis, Tennessee; and <sup>2</sup>Department of Physiology and <sup>3</sup>Department of Medicine, University of Tennessee Health Science Center, Memphis, Tennessee

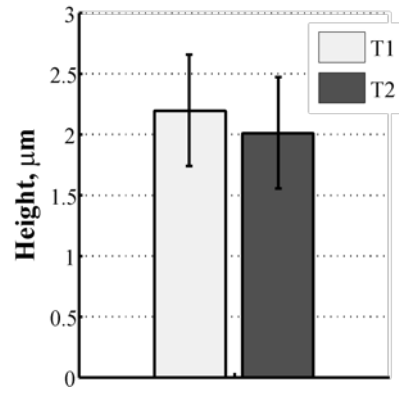

**Figure S1:** Average height of the cells near the migration front is not different at two time points. N=6, STE shown.
